# Supplementary material
Source: PubMed Central journal article supplement (PMC3241780)
Supplement: 1117347108_pnas.201117347SI.pdf [file 1117347108_pnas.201117347SI.pdf]

# Supporting Information

Zula et al. 10.1073/pnas.1117347108

## SI Materials and Methods

**Patients, Healthy Controls, and IFN- $\beta$  Stimulation.** Eleven patients with relapsing-remitting multiple sclerosis (RRMS; median age, 49.0 y; range, 28–59 y; median Expanded Disability Status Scale score, 1.5; range, 0–3.5) who received IFN- $\beta$ 1a therapy for various amounts of time (median time, 5.0 y; range, 0–15 y), consented to give whole blood (according to an institutional review board-approved protocol at the Cleveland Clinic) before injection with IFN- $\beta$ 1a, and nine of the 11 patients with RRMS also donated blood at different times after injection with IFN- $\beta$ 1a (Avonex; 30  $\mu$ g/0.5 mL prefilled syringe,  $12 \times 10^6$  IU/mL; Biogen Idec). Four of the 11 patients returned after approximately 3 y to donate blood before and 18 h after IFN- $\beta$ 1a injection, to enable the determination of ex vivo and in vitro induction of TRAIL stimulated by IFN- $\beta$ . To obtain whole blood from patients with RRMS for in vitro stimulation with IFN- $\beta$ 1a, venipuncture always preceded the weekly injection with IFN- $\beta$ 1a. Concerning neutralizing antibodies (NAb) to IFN- $\beta$ 1a, information was available for only one of the 11 patients with RRMS. Patient 7, who was previously determined to have developed NABs, did not show any activation of STAT1/3/5 in response to injection of IFN- $\beta$ 1a (Fig. S3). Because the other 10 patients did show activation of STATs in response to IFN- $\beta$ 1a, we assume they did not develop any NAb. Ten healthy controls (median age, 25.5 y; range, 21–48 y) also consented to give blood according to an institutional review board-approved protocol at the Cleveland Clinic. One of the healthy donors returned after 1 wk and donated blood again. For in vitro stimulation of whole blood from patients with RRMS and healthy subjects, undiluted whole blood was stimulated with IFN- $\beta$ 1a (varying amounts as indicated) in 6- or 10-cm culture dishes or 50 mL Falcon tubes (BD Biosciences) within 15 min after venipuncture. All in vitro stimulations were performed in a Thermo Electron Steri-Cycle HEPA class 100 CO<sub>2</sub> incubator at 37 °C (Thermo Fisher Scientific). After ex vivo or in vitro stimulation, whole blood was fixed immediately and erythrocytes were lysed for intracellular detection of tyrosine-phosphorylated STATs, phosphorylated kinases, or serine-phosphorylated NF- $\kappa$ B p65 in leukocyte subsets, by using flow cytometry. For each staining, 130  $\mu$ L of whole blood was used.

**Intracellular Detection of Activated STAT, Akt, p38, ERK, and NF- $\kappa$ B by Flow Cytometry.** We used the exact same protocol that we used previously to study induction of intracellular phosphoproteins in human leukocytes present in whole blood (1). After fixation, lysis of RBCs, and methanol incubation, the following antibodies were used additionally: PT(180)/PY(182)-p38 MAPK, PS(529)-NF- $\kappa$ B p65, and PT(202)/PY(204)-ERK (clones 36/p38, K10-895.12.50, G263-7 respectively; BD Biosciences) or PS(473)-Akt-fluorescein (R&D Systems), and were added in amounts as advised by the manufacturer and incubated at room temperature in the dark for 1 h. Flow data were analyzed with WinList (Verity Software). An example of the analysis can be seen in our previously published study (1). The method described earlier results in phosphoflow data with excellent repeatability because duplicates show little variance.

**Detection of Surface TRAIL Protein on Leukocytes by Flow Cytometry.** Whole blood was drawn before and 18 h after IFN- $\beta$ 1a injection,

and surface markers to distinguish leukocyte subsets in whole blood were stained with anti-human-CD4-PC5, -CD19-PC7, and -CD14-FITC (clones 13B8.2, J3-119, and RMO52, respectively; Beckman Coulter), anti-CD3-Pacific blue, -CD123-biotin, -CD25-APC-cy7, -CD94-APC (clones UCHT1, 9F5, M-A251, and HP-3D9, respectively; BD Biosciences), anti-CD14-AF700 (clone Tük4; Invitrogen), and anti-TRAIL-PE (clone 75402, mouse IgG1; R&D Systems) or mouse IgG1-PE isotype control (clone MOPC-21; BD Biosciences) antibodies, using amounts as indicated by the manufacturers and incubating for 30 min at 4 °C (150  $\mu$ L whole blood was used per tube). After a wash with 3 mL wash buffer (tubes centrifuged at  $300 \times g$  for 10 min), and bringing the volume back to 150  $\mu$ L per tube by adding wash buffer, samples were incubated with 3  $\mu$ L of 10 $\times$ -diluted streptavidin-Pacific orange (Invitrogen) for 30 min at 4 °C. Whole blood samples were subsequently fixed by adding 102  $\mu$ L prewarmed 10% formaldehyde (Polysciences) and incubating for 10 min at 37 °C. The erythrocytes were lysed by adding 1,275  $\mu$ L of 0.12% Triton X-100 (Pierce) to each tube and incubation at room temperature for 30 min while shaking. After three washes with 3 mL wash buffer and centrifugation at  $300 \times g$  for 10 min, the cells were resuspended in 300  $\mu$ L wash buffer, and 50,000 cells were collected in the live gate with a LSRII flow cytometer (BD Biosciences). Flow data were analyzed with WinList (Verity Software). The percentage of IFN- $\beta$ -induced TRAIL in leukocyte subsets was determined by subtracting the percentage of positive cells in unstimulated cells (before injection) from the percentage of positive cells in stimulated cells (after injection).

The induction of TRAIL on leukocytes after stimulation with 1,500 IU/mL IFN- $\beta$ 1a in vitro for 18 h was done by using essentially the same experimental approach described above, with the only exception that whole blood was diluted (1:2) with plain RPMI media for detection of TRAIL after IFN stimulation in vitro for 18 h. In addition, to study the dependency of TRAIL induction on activation of PI3K/Akt and p38 MAPK, whole blood was pretreated with 25 mM Ly294,002 or 20 mM SB203580, respectively (Sigma-Aldrich; both specific chemical inhibitors dissolved in DMSO) for 30 min and subsequently stimulated with 1,500 IU/mL IFN- $\beta$ 1a. The percentage of TRAIL-positive monocytes and granulocytes of the four patients with RRMS was set at 100% for DMSO pretreated (i.e., control) leukocyte subset, and the percentage change in TRAIL caused by pretreatment with the specific inhibitors was calculated.

**Statistical Analysis.** InStat 3 software (GraphPad Software) was used for statistical analyses. The nonparametric Friedman test was used to test whether the four (monocytes, B cells, and CD8<sup>+</sup> and CD4<sup>+</sup> T cells) or five (granulocytes, monocytes, B cells, and CD8<sup>+</sup> and CD4<sup>+</sup> T cells) leukocyte subsets differed with respect to activation of p38 MAPK, STAT1, STAT3, and STAT5, or induction of TRAIL protein. When the Friedman test showed a significant difference ( $P < 0.05$ ), post-hoc analysis was subsequently performed by using a Dunn test to detect which blood subsets differed significantly from each other. When calculating the  $P$  values, the Dunn test takes into account the number of comparisons one is making (i.e., Bonferroni adjustment).

1. van Boxel-Dezaire AH, et al. (2010) Major differences in the responses of primary human leukocyte subsets to IFN-beta. *J Immunol* 185:5888–5899.

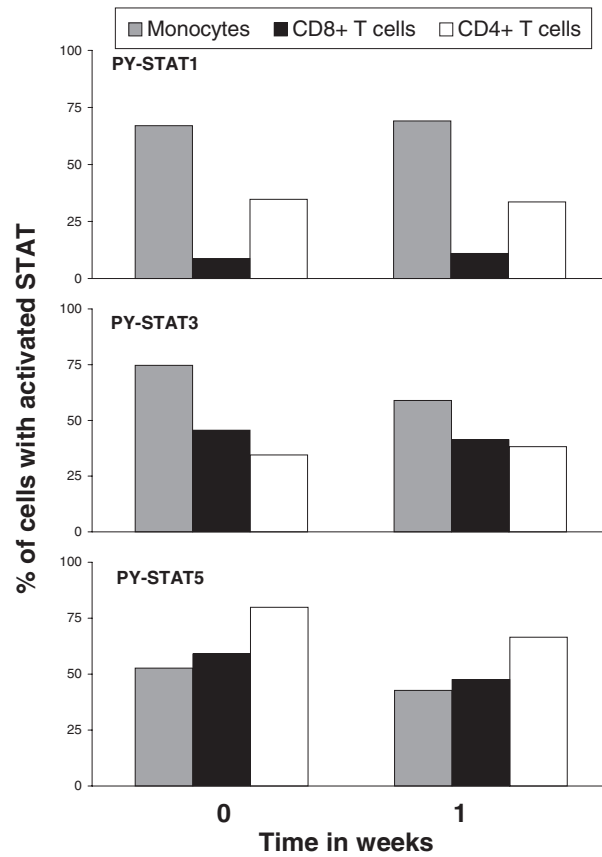

**Fig. S1.** Whole blood of a single donor repeatedly stimulated with IFN- $\beta$  in vitro shows a similar STAT activation pattern over time. Whole blood of a healthy donor was stimulated in vitro with 1,000 IU/mL IFN- $\beta$ 1a (Avonex) for 25 min. Exactly 1 wk later, blood was drawn from the same donor and stimulated in the same manner, revealing a similar STAT activation pattern in leukocyte subsets (monocytes and CD4<sup>+</sup> and CD8<sup>+</sup> T cells) as the week before.

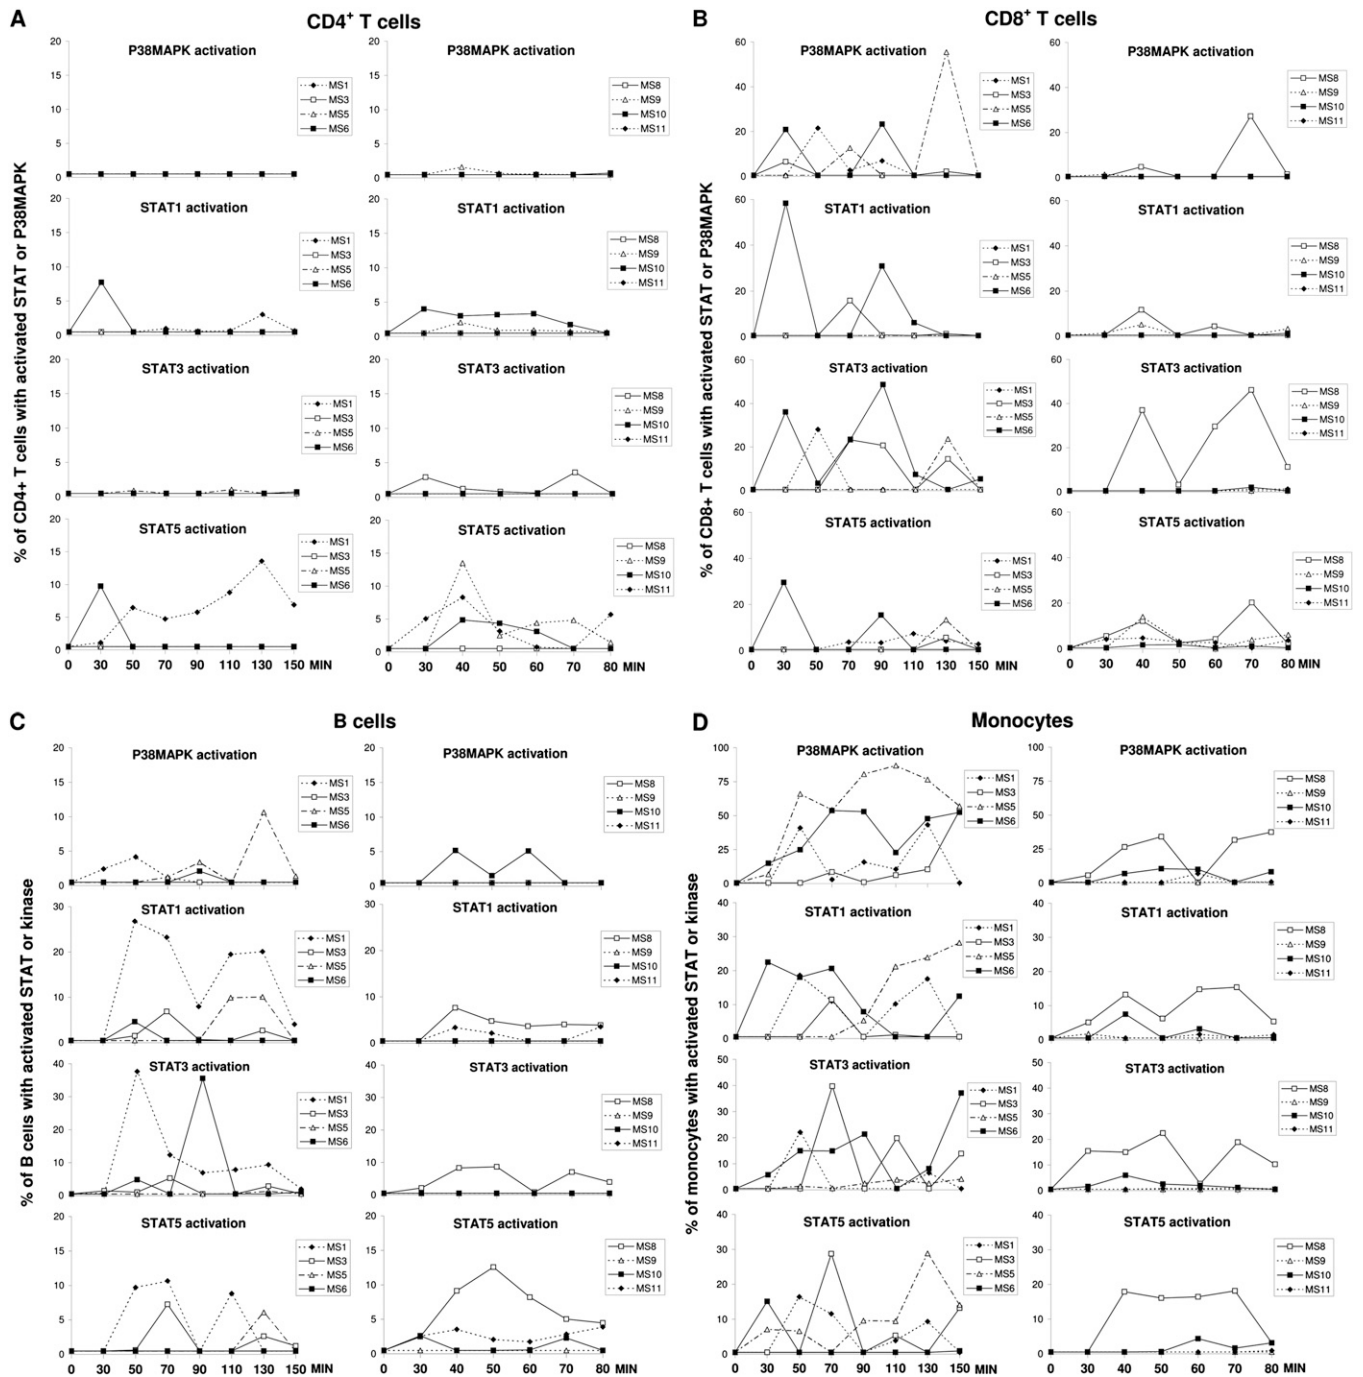

**Fig. 52.** Analysis of STAT and p38 activation after injection of IFN- $\beta$ 1a into patients with RRMS. Eight patients with RRMS (patients 1, 3, 5, 6, and 8–11) were injected i.m. with IFN- $\beta$ 1a and blood was sampled before injection and at 20-min intervals between 30 and 150 min ( $n = 4$ ; *Left*) or at 10-min intervals between 30 and 80 min ( $n = 4$ ; *Right*) after injection. Whole blood was immediately fixed and further processed as described in *Materials and Methods*. Flow cytometric analysis of CD4<sup>+</sup> T cells (*A*), CD8<sup>+</sup> T cells (*B*), B cells (*C*), and monocytes (*D*) revealed an oscillating pattern of STAT1, STAT3, STAT5, and p38 activation over time, with initial peak responses between 30 and 70 min after injection.

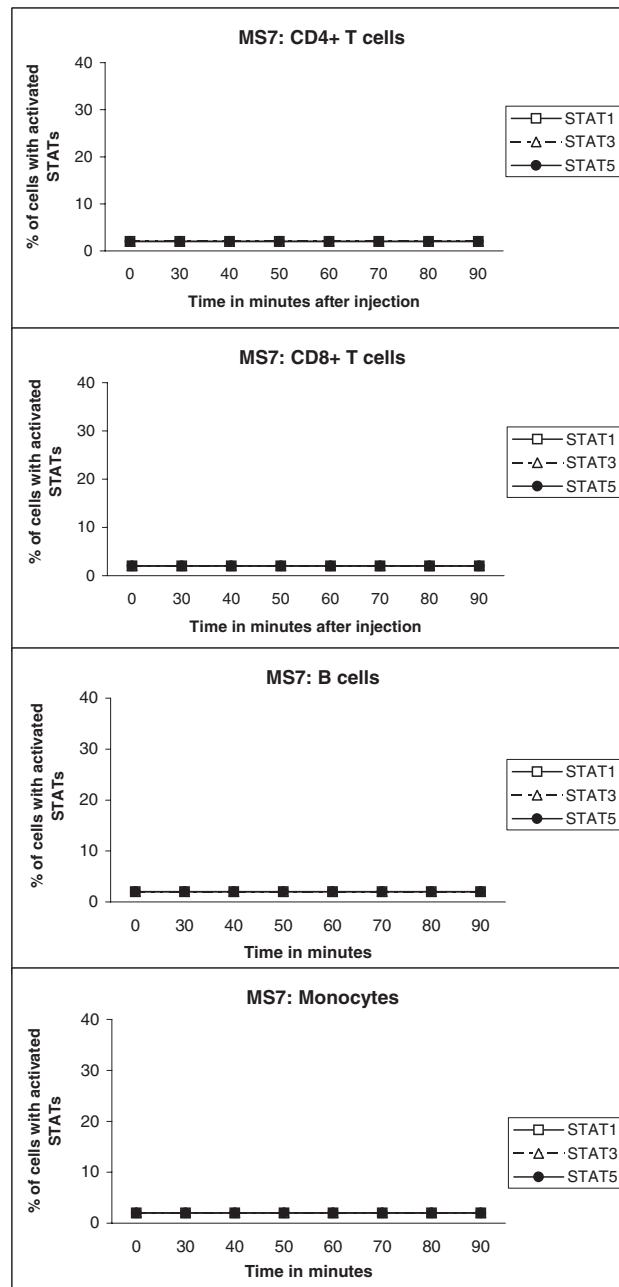

**Fig. S3.** In one patient with RRMS who developed NAb against IFN- $\beta$ 1a, no activation of STATs could be detected after injection with IFN- $\beta$ 1a. RRMS patient 7 was injected i.m. with IFN- $\beta$ 1a and blood was sampled before injection and at 10-min intervals between 30 and 90 min after injection. Whole blood was immediately fixed and further processed as described in *Materials and Methods*. Flow cytometric analysis of CD4<sup>+</sup> T cells, CD8<sup>+</sup> T cells, B cells, and monocytes revealed that no activation of STAT1, STAT3, or STAT5 occurred after injection.

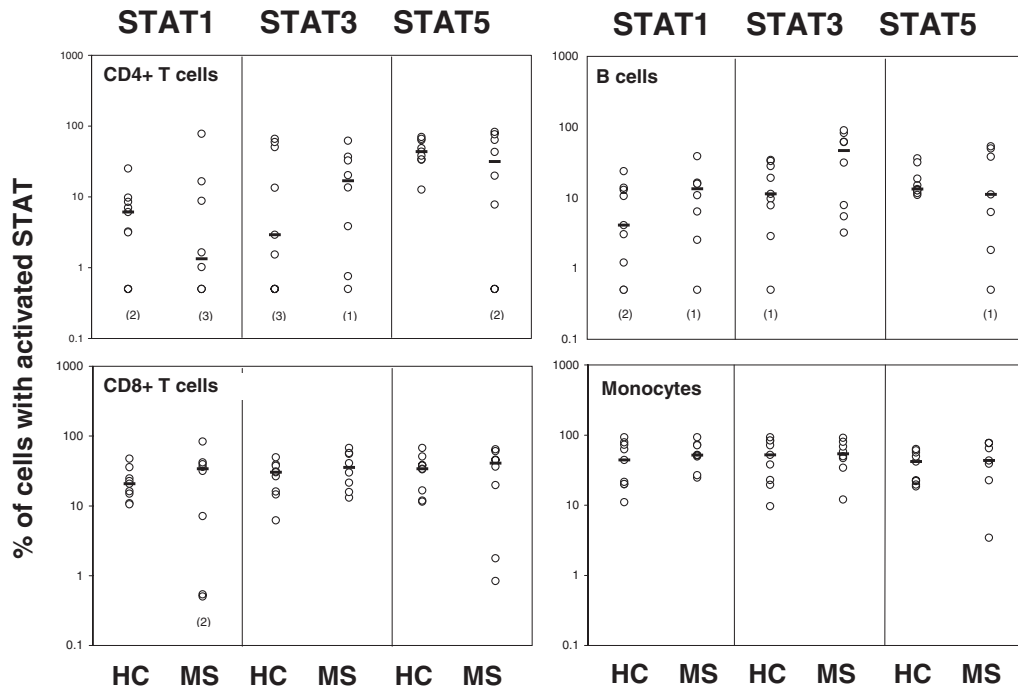

**Fig. S4.** Similar activation of STAT1, STAT3, and STAT5 in leukocyte subsets of healthy controls and patients with RRMS after stimulation with IFN- $\beta$ 1a in vitro. Whole blood from nine healthy donors and from eight patients with RRMS, whose blood was drawn before IFN- $\beta$ 1a injection, was stimulated with 500 IU/mL IFN- $\beta$ 1a for 25 min in vitro to determine activation of STAT1, STAT3, and STAT5. The median percentages of activated STATs in leukocytes are indicated with horizontal bars. The Mann-Whitney test indicated no significant differences between healthy controls or patients with RRMS with respect to the IFN- $\beta$ -induced activation of STAT1, STAT3, and STAT5 in leukocytes in vitro. The numbers between brackets indicate the numbers of patients with RRMS (MS) or healthy controls (HC) who showed undetectable activation of STAT1, STAT3, or STAT5 within each leukocyte subset. Note that the RRMS data in this figure are the same as the in vitro data shown in Fig. 2, *Right*.

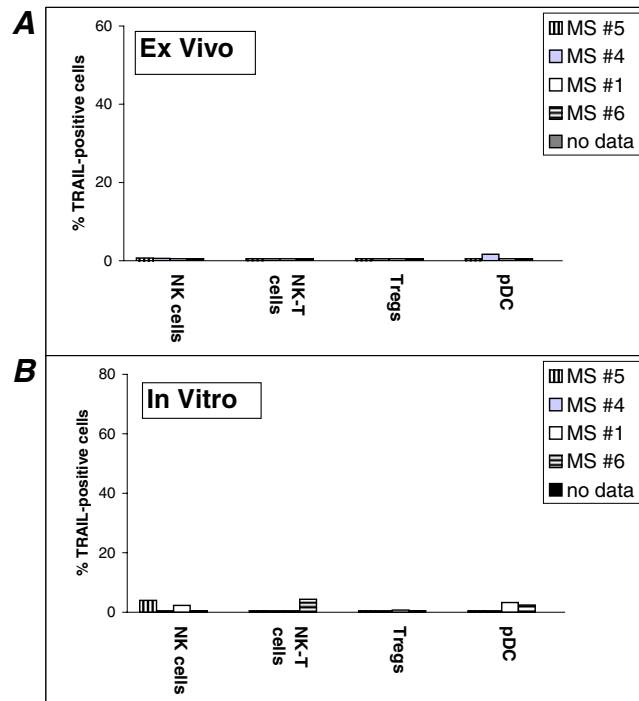

**Fig. S5.** No induction of TRAIL on certain leukocytes of patients with RRMS after stimulation with IFN- $\beta$ 1a in vitro and in vivo. The percentages of TRAIL-positive leukocytes were determined in four patients with RRMS (patients 1 and 4–6: same patients as in Fig. S2) 18 h after injection with IFN- $\beta$ 1a (Fig. S5A), or after stimulation of whole blood samples of four patients with RRMS with 1,500 IU/mL IFN- $\beta$ 1a in vitro for 18 h (Fig. S5B). For the latter, blood drawn before injection with IFN- $\beta$ 1a was treated in vitro. Surface TRAIL expression on NK cells (CD94<sup>+</sup>/CD3<sup>-</sup>), NK T cells (CD94<sup>+</sup>/CD3<sup>+</sup>), regulatory T cells (Tregs; CD4<sup>+</sup>/CD25<sup>high</sup>), or pDCs (CD123<sup>+</sup>/CD14<sup>-</sup>) of patient 12 after IFN- $\beta$ 1a injection or stimulation with IFN- $\beta$ 1a in vitro was not determined.



**Table S1. Differential activation of STATs and cell type-specific activation of p38 after IFN- $\beta$ 1a injection ( $n = 8$ )**

| Subset                            | PY-STAT1 | PY-STAT3 | PY-STAT5 | PT/PY-P38 |
|-----------------------------------|----------|----------|----------|-----------|
| CD4 <sup>+</sup> T cells, $n$ (%) | 2 (25)   | 1 (13)   | 5 (63)   | 0 (0)     |
| CD8 <sup>+</sup> T cells, $n$ (%) | 4 (50)   | 4 (50)   | 5 (63)   | 5 (63)    |
| B cells, $n$ (%)                  | 5 (63)   | 4 (50)   | 5 (63)   | 2 (25)    |
| Monocytes, $n$ (%)                | 5 (63)   | 5 (63)   | 6 (75)   | 7 (88)    |

The data for eight patients with RRMS (patients 1, 3, 5, 6, and 8–11) are summarized. Only data for activation of STATs or p38 that was observed in more than 3% of the cells within each leukocyte subset between 30 and 70 min after injection has been included. Shown are also the percentages of patients in which the activation of STAT1, STAT3, STAT5, or p38 was observed (between brackets).
